# Supplementary material for: Tip30 controls differentiation of murine mammary luminal progenitor to estrogen receptor-positive luminal cell through regulating FoxA1 expression
Source: PubMed Central journal article supplement — Cell Death Dis. 2014 May 22;5(5):e1242–. doi: 10.1038/cddis.2014.224 (PMC4047867; doi:10.1038/cddis.2014.224), 2014-05-22
Supplement: cddis2014224x1.pdf [file cddis2014224x1.pdf]

**Tip30 controls differentiation of murine mammary luminal progenitor to estrogen receptor-positive luminal cell through regulating FoxA1 expression.**

Fengsheng Chen, Aimin Li, Shenglan Gao, Elizabeth A VanSickle, Daniel Holland, Mark Williams, Eran Andrechek, Chengliang Zhang, Chengfeng Yang, Rongcheng Luo, and Hua Xiao

**Supplementary Figure S1.** A. Gene expression profiles of *Tip30*<sup>-/-</sup> *MMTV-Neu* tumors cluster closely with human luminal types of breast cancers. Nine *Tip30*<sup>-/-</sup> *MMTV-Neu* tumor (Neu *Tip30*<sup>-/-</sup>) and 15 tumor *MMTV-Neu* tumors (Neu) datasets were analyzed with 232 annotated human breast cancer datasets by hierarchical clustering using the methods described previously<sup>1</sup>. Red represents genes that are upexpressed relative to the median, whereas green represents genes that are underexpressed relative to the median. Each color-coded bar indicates one human (brown) or mouse (blue) sample dataset. Human samples are indicated by intrinsic subtype as determined. Brown line indicates human sample; blue line indicates mouse sample. B: Examination of highly expressed genes in *Tip30*<sup>-/-</sup> from (A) in human HER2+ breast cancer revealed a number of genes that predicted survival including examples such as Major Histocompatibility Complex (MHC). Samples with high (blue) or low (red) MHC expression were noted to have survival

differences ( $p=0.0369$ ).

### Supplemental Figure 1

**A**

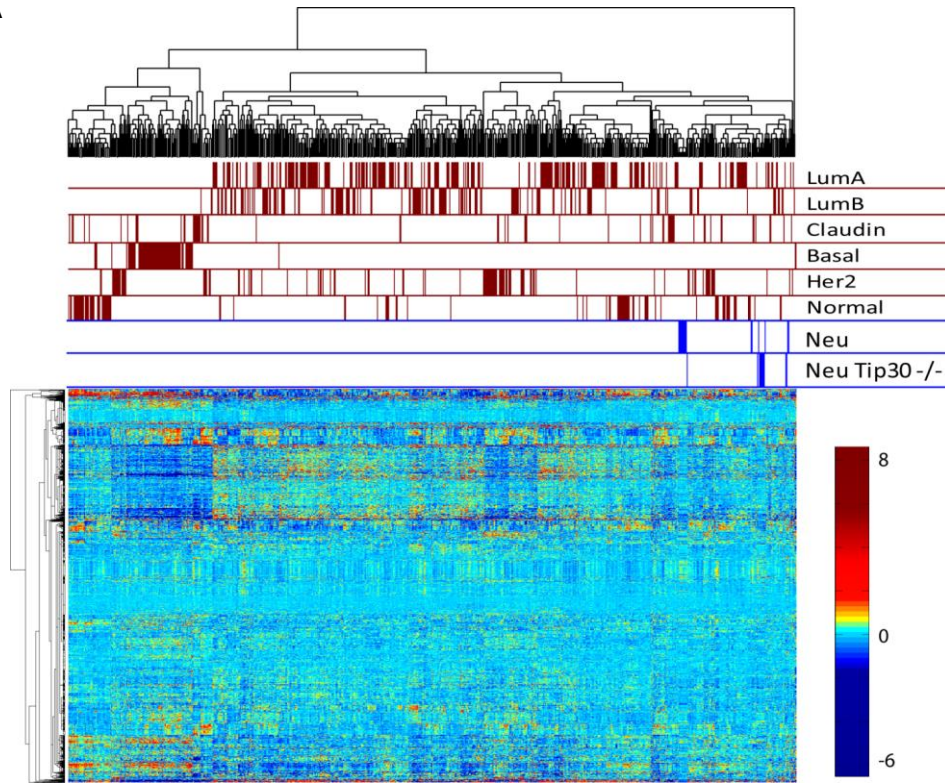

**B**

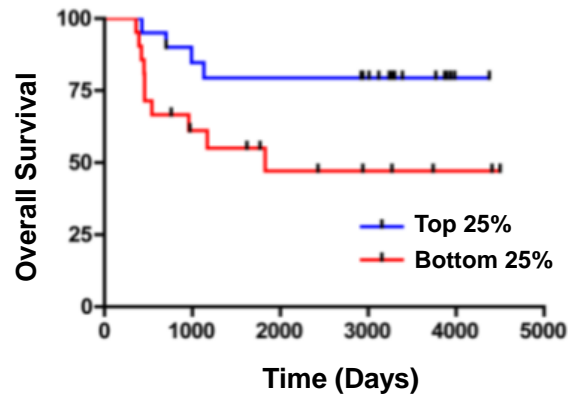

**Supplementary Figure S2.** Inactivation of AKT in *Tip30*<sup>-/-</sup> mammary cells downregulated FOXA1 expression. A, Western blot analysis of pAKT and AKT protein levels in *Tip30*<sup>-/-</sup> and *Tip30*<sup>+/+</sup> mammary glands from 5 month old mice. Histogram represented the pAKT levels expressed as the percentages of  $\beta$ -actin in *Tip30*<sup>-/-</sup> and *Tip30*<sup>+/+</sup> mammary glands. Data were mean  $\pm$  SEM of three mice per group. B, Western blot analysis of pAKT, AKT and FoxA1 protein levels in *Tip30*<sup>-/-</sup> mammary cells treated with or without NVP-BEZ235 and LY294002 respectively.

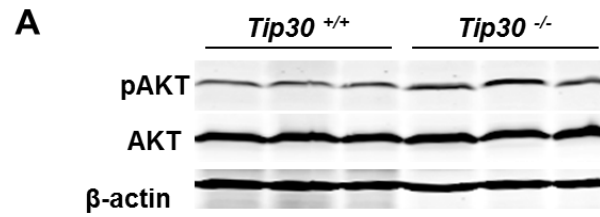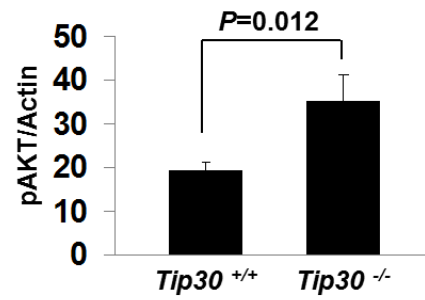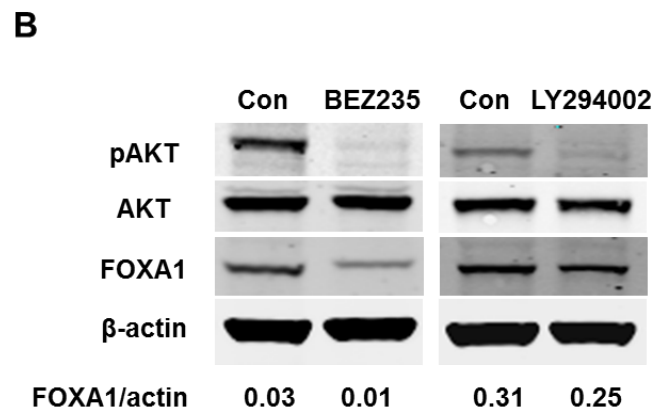

## References

1. Perou CM, Sorlie T, Eisen MB, van de Rijn M, Jeffrey SS, Rees CA, *et al.* Molecular portraits of human breast tumours. *Nature* 2000, **406**(6797): 747-752.
